# Supplementary material
Source: PubMed Central journal article supplement (PMC7038818)
Supplement: NIHMS1551294-supplement-S_Figures.pdf [file NIHMS1551294-supplement-S_Figures.pdf]

Figure S1: Mediation models predicting vaccination behavior in the 2010-11 flu season, controlling for (A) demographics and (B) vaccination behavior in the 2009-10 flu season

(A)

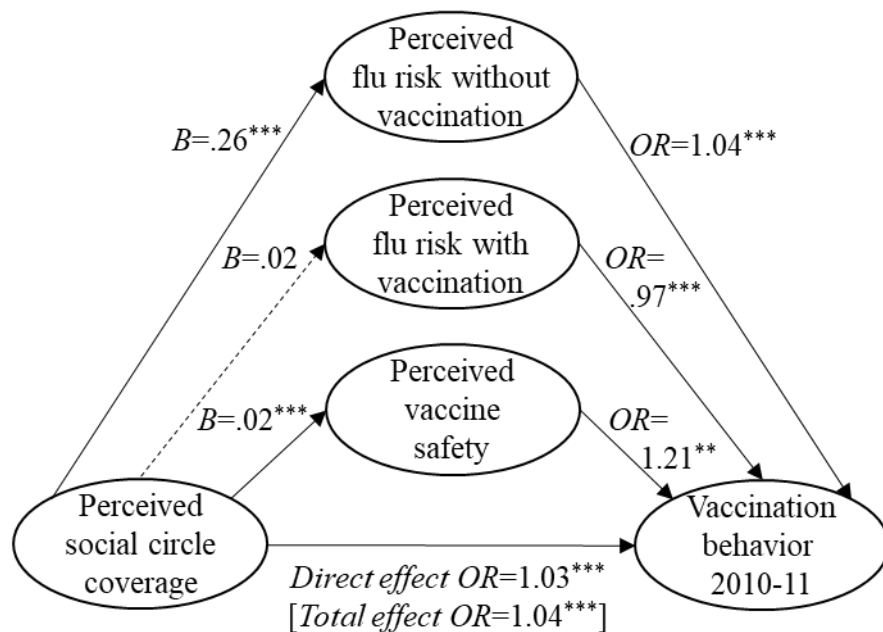

(B)

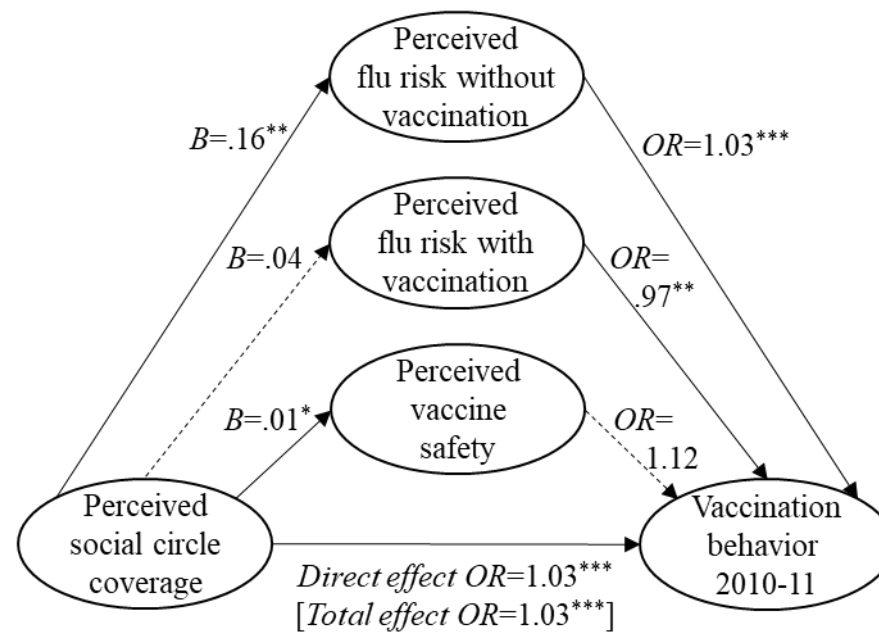

<sup>+</sup>  $p < .10$ ; \*  $p < .05$ ; \*\*  $p < .01$ ; \*\*\*  $p < .001$

Note: Associated Sobel mediation tests appear in Table S3. Linear regressions (unstandardized  $B$ ) were used to predict each of the three continuous mediator variables (perceived flu risk without vaccination, perceived flu risk with mediation, and perceived vaccine safety). Logistic regressions ( $OR$ ) were used to predict the dichotomous outcome variable (vaccination behavior in 2010-11), respectively corresponding to models 1A-B and 2A-B in Table 2. The direct effect [vs. total effect] of perceived social circle vaccine coverage on vaccination behavior in 2010-11 reflects the relationship between these variables after [vs. before] controlling for the three mediator variables.

Figure S2: Mediation models predicting vaccination behavior in the 2011-12 flu season, controlling for (A) demographics, (B) vaccination behavior in the 2009-10 flu season, and (C) vaccination behavior in the 2010-11 flu season

(A)

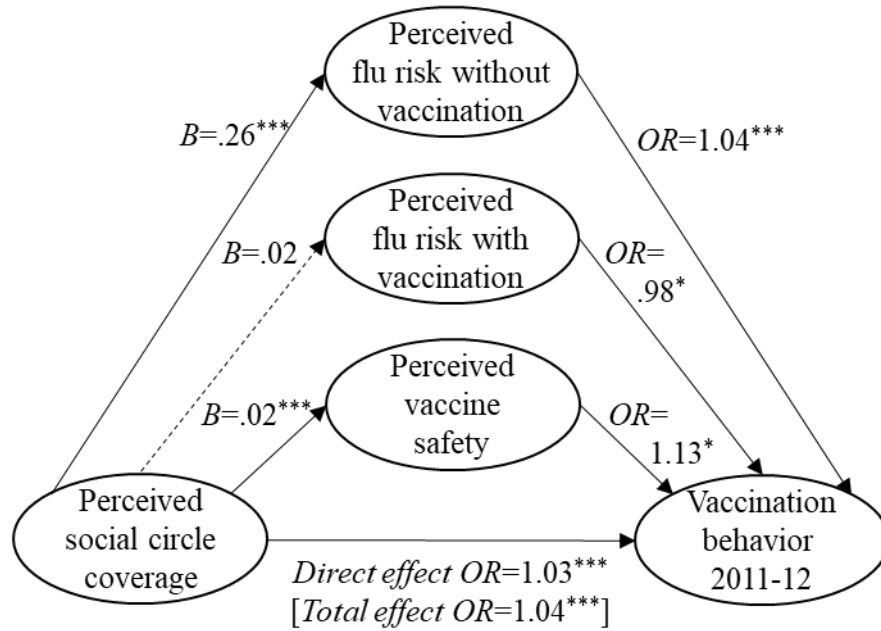

(B)

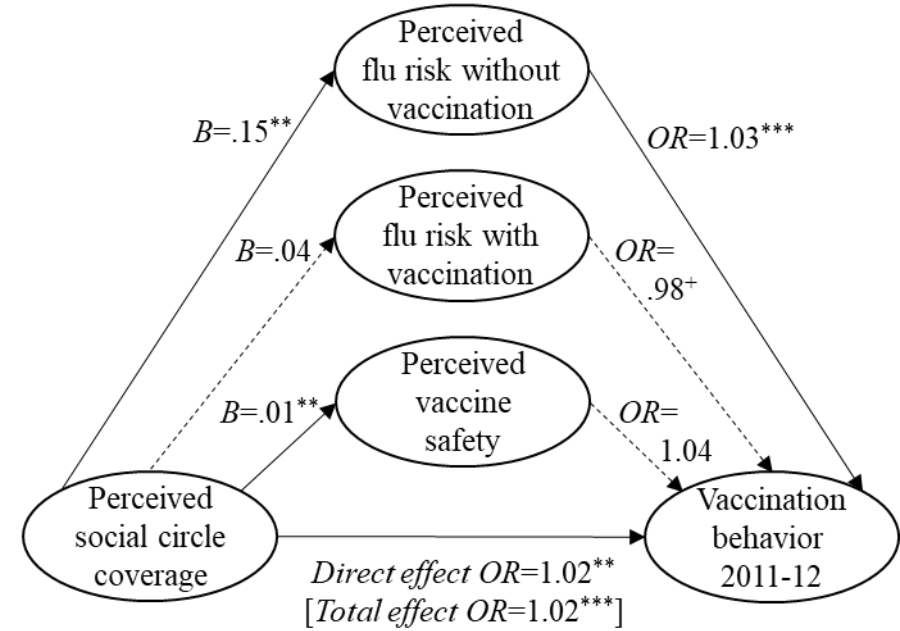

Figure S2 (contd.)

(C)

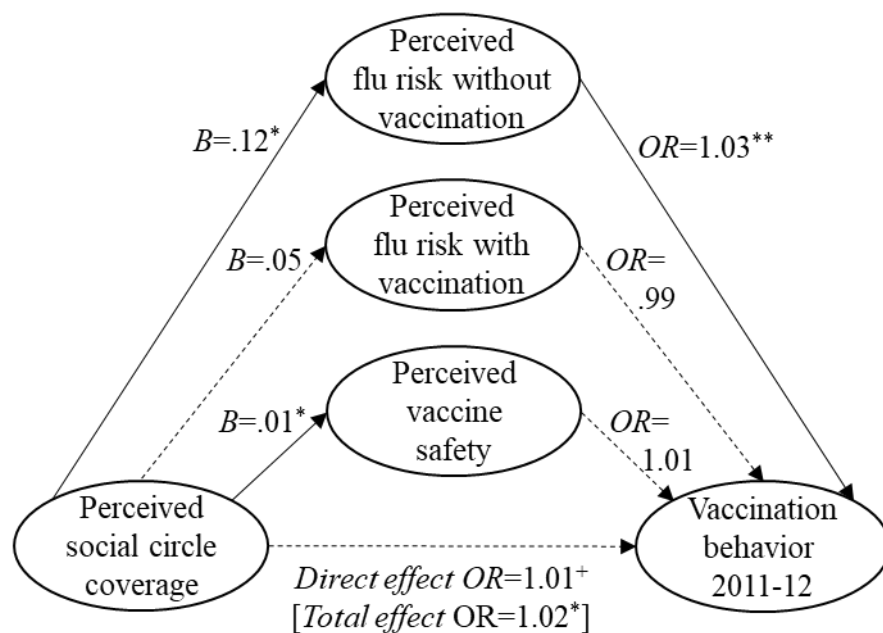

<sup>+</sup>  $p < .10$ ; \*  $p < .05$ ; \*\*  $p < .01$ ; \*\*\*  $p < .001$

Note: Associated Sobel mediation tests appear in Table S3. Linear regressions (unstandardized  $B$ ) were used to predict each of the three continuous mediator variables (perceived flu risk without vaccination, perceived flu risk with mediation, and perceived vaccine safety). Logistic regressions ( $OR$ ) were used to predict the dichotomous outcome variable (vaccination behavior in 2011-12), respectively corresponding to models 1A-B, 2A-B, and 3A-B in Table 3. The direct effect [vs. total effect] of perceived social circle vaccine coverage on vaccination behavior in 2010-11 reflects the relationship between these variables after [vs. before] controlling for the three mediator variables.

Figure S3: Mediation models predicting vaccination behavior in the 2015-16 flu season, controlling for (A) demographics, (B) vaccination behavior in the 2009-10 flu season, (C) vaccination behavior in the 2010-11 flu season, and (D) vaccination behavior in the 2015-16 flu season.

(A)

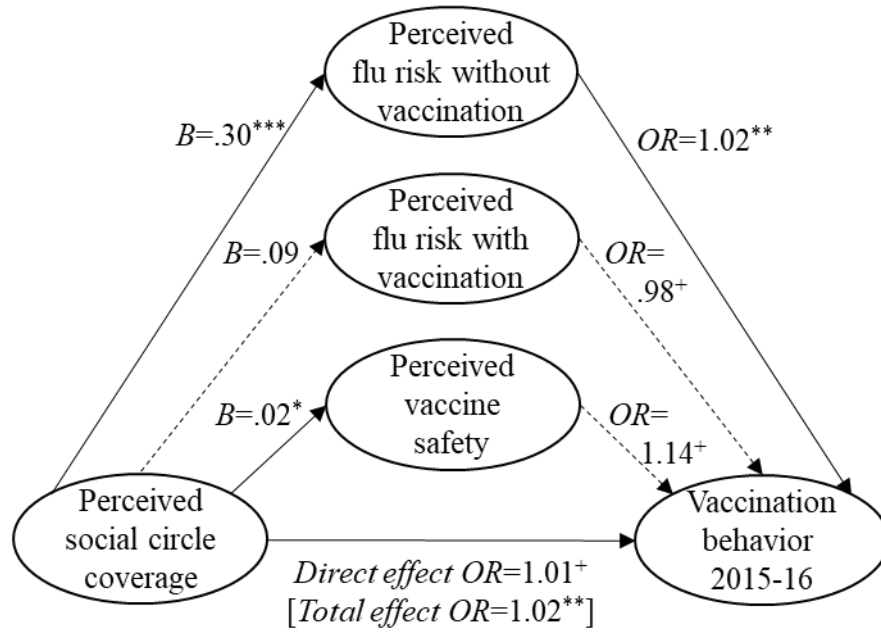

(B)

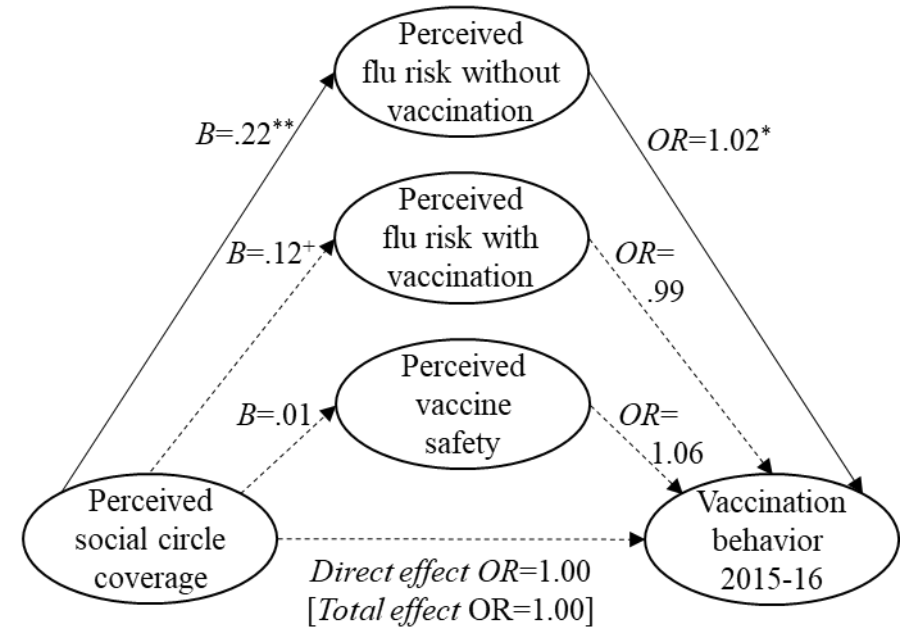

Figure S3 (contd.)

(C)

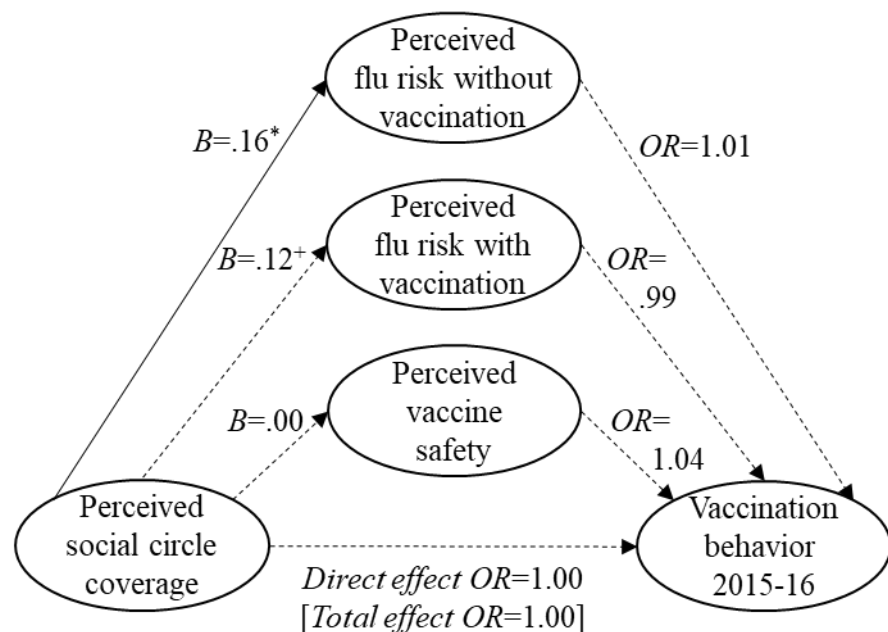

(D)

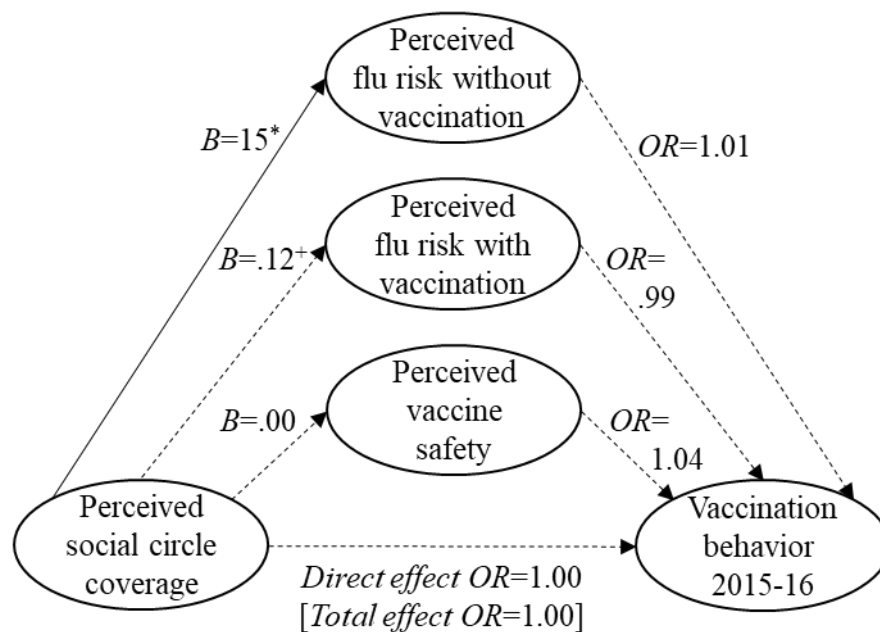

<sup>+</sup>  $p < .10$ ; \*  $p < .05$ ; \*\*  $p < .01$ ; \*\*\*  $p < .001$

Note: Associated Sobel mediation tests appear in Table S3. Linear regressions (unstandardized  $B$ ) were used to predict each of the three continuous mediator variables (perceived flu risk without vaccination, perceived flu risk with mediation, and perceived vaccine safety). Logistic regressions ( $OR$ ) were used to predict the dichotomous outcome variable (vaccination behavior in 2015-16), respectively corresponding to models 1A-B, 2A-B, 3A-B, and 4A-B in Table 4. The direct effect [vs. total effect] of perceived social circle vaccine coverage on vaccination behavior in 2010-11 reflects the relationship between these variables after [vs. before] controlling for the three mediator variables.
