# Supplementary material
Source: PubMed Central journal article supplement (PMC7038818)
Supplement: NIHMS1551294-supplement-S_Tables.pdf [file NIHMS1551294-supplement-S_Tables.pdf]

Table S1: Descriptive statistics

| Survey Wave 1 variable                                     | Survey Wave 1                                             |                                                                            | Survey Wave 2                                             |                                                              | Survey Wave 3                                             |                                                               |
|------------------------------------------------------------|-----------------------------------------------------------|----------------------------------------------------------------------------|-----------------------------------------------------------|--------------------------------------------------------------|-----------------------------------------------------------|---------------------------------------------------------------|
|                                                            | Invitees completing in September 2011<br>( <i>N</i> =357) | Invitees not completing in September 2011<br>( <i>N</i> =224) <sup>a</sup> | Survey Wave 1 participants completing<br>( <i>N</i> =338) | Survey Wave 1 participants not completing<br>( <i>N</i> =19) | Survey Wave 1 participants completing<br>( <i>N</i> =216) | Survey Wave 1 participants not completing<br>( <i>N</i> =141) |
| Mean (SD) age                                              | 49.45<br>(15.41)                                          | 43.87 <sup>***</sup><br>(15.44)                                            | 49.79<br>(15.27)                                          | 43.42 <sup>+</sup><br>(17.04)                                | 53.27<br>(13.26)                                          | 43.60 <sup>***</sup><br>(16.64)                               |
| Percent (N) female                                         | 50.98%<br>(182)                                           | 54.46%<br>(122)                                                            | 50.59%<br>(171)                                           | 57.89%<br>(11)                                               | 51.85%<br>(112)                                           | 49.65%<br>(70)                                                |
| Percent (N) with college education                         | 45.66%<br>(163)                                           | 35.71% <sup>*</sup><br>(80)                                                | 45.56%<br>(154)                                           | 47.37%<br>(9)                                                | 50.46%<br>(109)                                           | 38.30% <sup>*</sup><br>(54)                                   |
| Percent (N) white                                          | 88.52%<br>(316)                                           | 79.46% <sup>**</sup><br>(178)                                              | 88.17%<br>(298)                                           | 94.74%<br>(18)                                               | 89.81%<br>(194)                                           | 86.52%<br>(122)                                               |
| Mean (SD) reported social circle vaccine coverage (0-100%) | 36.59%<br>(26.42)                                         | 37.77%<br>(28.44)                                                          | 36.87%<br>(26.69)                                         | 31.45%<br>(20.79)                                            | 36.47%<br>(25.69)                                         | 36.77%<br>(27.58)                                             |
| Mean (SD) perceived flu risk without vaccination (0-100%)  | 32.54%<br>(25.69)                                         | 30.44%<br>(23.72)                                                          | 32.49%<br>(25.64)                                         | 32.90%<br>(26.78)                                            | 31.87%<br>(24.94)                                         | 33.58%<br>(26.85)                                             |
| Mean (SD) perceived flu risk with vaccination (0-100%)     | 19.65%<br>(22.54)                                         | 22.77%<br>(22.57)                                                          | 19.22%<br>(21.98)                                         | 27.42%<br>(30.61)                                            | 19.17%<br>(22.33)                                         | 20.40%<br>(22.91)                                             |
| Mean (SD) perceived vaccine safety (1-7)                   | 4.22<br>(2.39)                                            | 3.78 <sup>+</sup><br>(2.44)                                                | 4.24<br>(2.38)                                            | 4.24<br>(2.38)                                               | 4.18<br>(2.41)                                            | 4.28<br>(2.37)                                                |
| Percent (N) who reported vaccinating in 2010-11 flu season | 42.86%<br>(153)                                           | 35.12% <sup>+</sup><br>(59)                                                | 43.79%<br>(148)                                           | 26.32%<br>(5)                                                | 44.91%<br>(97)                                            | 39.72%<br>(56)                                                |
| Percent (N) who reported vaccinating in 2009-10 flu season | 42.58%<br>(152)                                           | 29.81% <sup>**</sup><br>(48)                                               | 42.90%<br>(145)                                           | 36.84%<br>(7)                                                | 43.06%<br>(93)                                            | 41.84%<br>(59)                                                |

<sup>a</sup>Number of participants who had missing data varied across the variables.

Note: Differences between groups were tested by *t*-tests for reported means, and by chi-square tests for reported percentages. <sup>+</sup> *p*<.10; <sup>\*</sup> *p*<.05; <sup>\*\*</sup> *p*<.01; <sup>\*\*\*</sup> *p*<.001

Table S2: Logistic regressions predicting reported vaccination behavior for the 2010-11 flu season (Odds Ratio; 95% confidence interval)

| Predictor and control variables                               | Model 1A                | Model 1B                             | Model 2A                   | Model 2B                             |
|---------------------------------------------------------------|-------------------------|--------------------------------------|----------------------------|--------------------------------------|
| Social circle vaccine coverage in 2010-11 flu season (0-100%) | 1.05***<br>(1.03, 1.06) | 1.04***<br>(1.02, 1.06)              | 1.03***<br>(1.01, 1.05)    | 1.03**<br>(1.01, 1.05)               |
| Perceived flu risk without vaccination (0-100%)               |                         | 1.04*** <sup>a</sup><br>(1.03, 1.06) | -                          | 1.04*** <sup>a</sup><br>(1.02, 1.06) |
| Perceived flu risk with vaccination (0-100%)                  |                         | .97**<br>(.95, .99)                  | -                          | .98<br>(.96, 1.01)                   |
| Perceived vaccine safety (1-7)                                |                         | 1.24*** <sup>b</sup><br>(1.06, 1.44) | -                          | 1.10<br>(.90, 1.34)                  |
| Age                                                           | 1.06***<br>(1.03, 1.08) | 1.06***<br>(1.03, 1.09)              | 1.05***<br>(1.01, 1.09)    | 1.05*<br>(1.01, 1.09)                |
| Female                                                        | 1.52<br>(.78, 2.95)     | 1.21<br>(.56, 2.59)                  | 1.41<br>(.59, 3.38)        | 1.03<br>(.40, 2.68)                  |
| College Education                                             | 2.24*<br>(1.14, 4.37)   | 2.45*<br>(1.10, 5.45)                | 1.02<br>(.41, 2.52)        | 1.02<br>(.37, 2.83)                  |
| White                                                         | .65<br>(.22, 1.93)      | .38<br>(.11, 1.32)                   | 1.05<br>(.24, 4.60)        | .83<br>(.15, 4.45)                   |
| Past vaccination behavior in 2009-10 flu season               |                         |                                      | 31.60***<br>(12.90, 77.40) | 25.86***<br>(9.68, 69.10)            |
| Nagelkerke R <sup>2</sup>                                     | .38                     | .53                                  | .67                        | .71                                  |

<sup>+</sup>  $p < .10$ ; \*  $p < .05$ ; \*\*  $p < .01$ ; \*\*\*  $p < .001$

<sup>a</sup> Mediated the relationship between perceived 2010-11 social circle vaccine coverage and predicted vaccination behavior ( $p < .05$ )

<sup>b</sup> Mediated the relationship between perceived 2010-11 social circle vaccine coverage and predicted vaccination behavior ( $p < .10$ )

Note: Analyses repeat those from Table 2, while limiting the sample to those 215 participants who completed all survey waves, as well as Survey Wave 1 in September 2011. All dependent and independent variables were reported in Survey Wave 1 in September 2011 before vaccine uptake among US adults took off for the 2011-12 flu season (Centers for Disease Control and Prevention, 2013)..

Table S3: Sobel  $z$ -test for mediation

| Predictor variable                              | 2010-11              |            | 2011-12              |           |                   | 2015-16              |                   |            |            |
|-------------------------------------------------|----------------------|------------|----------------------|-----------|-------------------|----------------------|-------------------|------------|------------|
|                                                 | Vaccination Behavior |            | Vaccination Behavior |           |                   | Vaccination Behavior |                   |            |            |
|                                                 | Figure S1A           | Figure S1B | Figure S2A           | Figure 2B | Figure S2C        | Figure S3A           | Figure S3B        | Figure S3C | Figure S3D |
| Perceived flu risk without vaccination (0-100%) | 3.81***              | 2.16*      | 3.79***              | 2.30*     | 1.82 <sup>+</sup> | 2.55*                | 1.65 <sup>+</sup> | .97        | .73        |
| Perceived flu risk with vaccination (0-100%)    | -.47                 | -.67       | -.52                 | -.66      | -.60              | -1.12                | -.89              | -.69       | -.62       |
| Perceived vaccine safety (1-7)                  | 2.55*                | 1.18       | 1.84 <sup>+</sup>    | .52       | .16               | 1.49                 | .40               | .25        | .24        |

<sup>+</sup>  $p < .10$ ; \*  $p < .05$ ; \*\*  $p < .01$ ; \*\*\*  $p < .001$

Note: Mediation models correspond to Figures S1-S3. We computed Sobel tests to assess the significance of mediation patterns, because Sobel tests can handle the inclusion of linear regressions on the continuous mediator variables and logistic regressions on the dichotomous outcome variable (Herr, 2006). Sobel test results were replicated in bootstrapping mediation models with 5,000 bootstrap samples, which relied on linear regression estimates for both the continuous mediator variables and the dichotomous outcome variables (Hayes, 2018).
